# Supplementary material for: Fucoidan inhibits CCL22 production through NF-κB pathway in M2 macrophages: a potential therapeutic strategy for cancer
Source: PubMed Central journal article supplement (PMC5075786; doi:10.1038/srep35855), 2016-10-24
Supplement: srep35855-s1.pdf [file srep35855-s1.pdf]

## **Supplementary Information**

### **Fucoidan inhibits CCL22 production through NF- $\kappa$ B pathway in M2**

#### **macrophages: a potential therapeutic strategy for cancer**

Jia Sun<sup>1,4</sup>, Jintang Sun<sup>1,\*</sup>, Bingfeng Song<sup>1</sup>, Lin Zhang<sup>1</sup>, Qianqian Shao<sup>1</sup>, Yanguo Liu<sup>1</sup>, Daoying Yuan<sup>3</sup>, Yun Zhang<sup>2</sup>, Xun Qu<sup>1,2,3,\*</sup>

<sup>1</sup>Institute of Basic Medical Sciences, Qilu Hospital of Shandong University, Jinan, 250012, Shandong, P.R. China

<sup>2</sup>The Key Laboratory of Cardiovascular Remodeling and Function Research, Qilu Hospital of Shandong University, Jinan, 250012, Shandong, P.R. China

<sup>3</sup>Key Laboratory of Precision Biomedicine, Institute of Zhongyuan Biomedical Sciences, Liaocheng People's hospital, Liaocheng, 252000, Shandong, P.R. China.

<sup>4</sup>Laboratory of Neuromuscular Disorders and Department of Neurology, Qilu Hospital of Shandong University, Jinan, 250012, Shandong, P.R. China

\*Correspondence and requests for materials should be addressed to X.Q. (email: [guxun@sdu.edu.cn](mailto:guxun@sdu.edu.cn)) and J.T.S. (email: [sunjintang003@163.com](mailto:sunjintang003@163.com))

**Supplementary Table S1 List of primers used in Quantitative RT-PCR**

| <b>Primer name</b> |         | <b>Sequence</b>                         |
|--------------------|---------|-----------------------------------------|
| TNF- $\alpha$      | Forward | 5'-CAG AGG GAA GAG TTC CCC AG-3'        |
|                    | Reverse | 5'-CCT TGG TCT GGT AGG AGA CG-3'        |
| TGF- $\beta$       | Forward | 5'- AAG GAC CTC GGC TGG AAG TG -3'      |
|                    | Reverse | 5'- CCC GGG CCA TGC TGG TTG TA -3'      |
| IL-1 $\beta$       | Forward | 5'-AAA CAG ATG AAG TGC TCC TTC CAG G-3' |
|                    | Reverse | 5'-TGG AGA ACA CCA CTT GTT GCT CCA-3'   |
| IL-6               | Forward | 5'-CCT TGG GTC CAG TTG CCT TCT-3'       |
|                    | Reverse | 5'-CCA GTG CCT CTT TGC TGC TTT C-3'     |
| IL-10              | Forward | 5'-GAT CCA GTT TTA CCT GGA GGA G-3'     |
|                    | Reverse | 5'-CCT GAG GGT CTT CAG GTT CTC -3'      |
| MRC-1              | Forward | 5'-CGA GGA AGA GGT TCG GTT CAC C-3'     |
|                    | Reverse | 5'-GCA ATC CCG GTT CTC ATG GC-3'        |
| CCL2               | Forward | 5'-CCC CAG TCA CCT GCT GTT AT-3'        |
|                    | Reverse | 5'-TGG AAT CCT GAA CCC ACT TC-3'        |
| CCL3               | Forward | 5'-GCA ACC AGT TCT CTG CAT CA-3'        |
|                    | Reverse | 5'-TGG CTG CTC GTC TCA AAG TA-3'        |
| CCL4               | Forward | 5'-GCT TTT CTT ACA CTG CGA GGA-3'       |
|                    | Reverse | 5'-CCA GGA TTC ACT GGG ATC AG-3'        |
| CCL5               | Forward | 5'-CGT GCC CAC ATC AAG GAG-3'           |
|                    | Reverse | 5'-GGA CAA GAG CAA GCA GAA AC-3'        |
| CCL18              | Forward | 5'-CTC TGC TGC CTC GTC TAT ACC T-3'     |
|                    | Reverse | 5'-CTT GGT TAG GAG GAT GAC ACC T-3'     |
| CCL22              | Forward | 5'-CGA GGA AGA GGT TCG GTT CAC C-3'     |
|                    | Reverse | 5'- CAT CTT CAC CCA GGG CAC TCT-3'      |
| GAPDH              | Forward | 5'-GAA GGT GAA GGT CGG AGT C-3'         |
|                    | Reverse | 5'-GAA GAT GGT GAT GGG ATT TC-3'        |

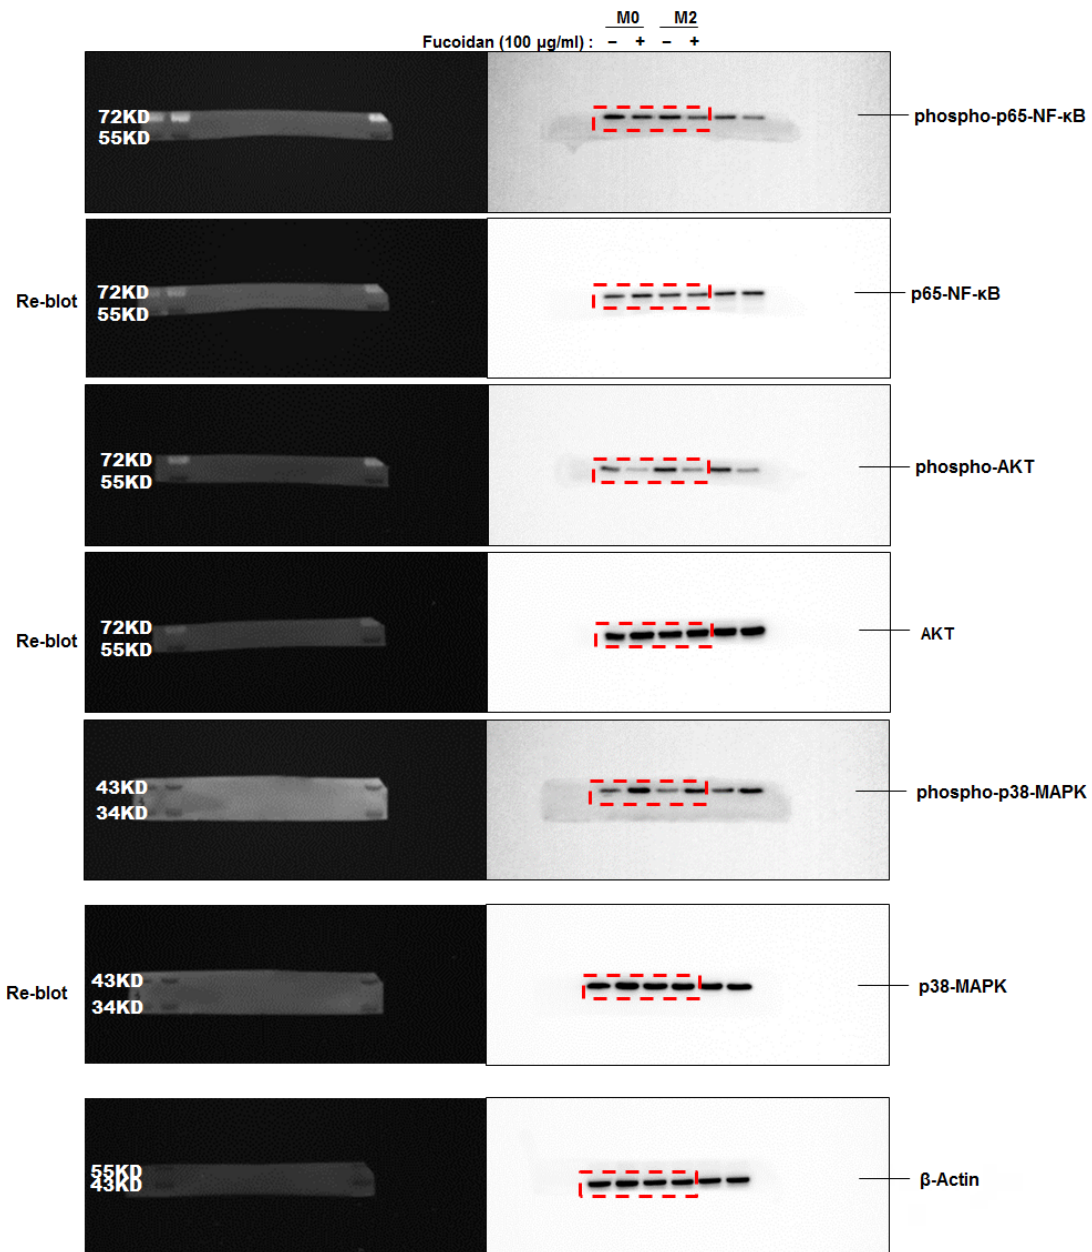

### Supplementary Figure S1

The original blot of Figure 4a. M0 and M2 macrophages derived from THP-1 cells were treated with PBS or fucoidan (100 µg/ml) for 1 h. Whole-cell lysates were analyzed by western blot using the appropriate antibodies. The specific protein bands were analyzed using the Amersham Imager 600 (GE Healthcare Life Sciences, Little Chalfont, UK). (Re-blot: The blots were stripped in re-blot plus strong solution and probed with either anti-p65-NF-κB, anti-AKT and anti-p38-MAPK.)

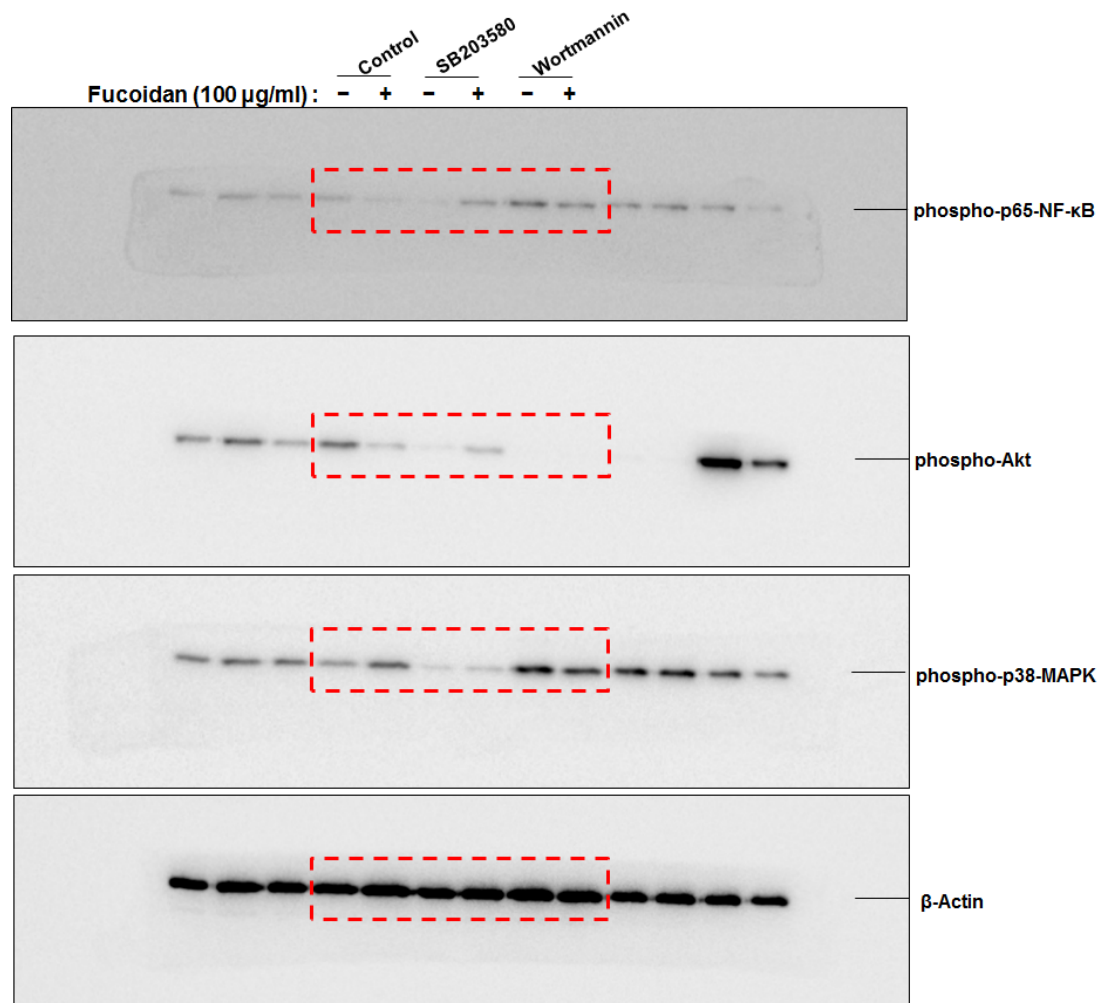

### Supplementary Figure S2

The original blot of Figure 5c. M2 macrophages derived from THP-1 cells were pretreated with the Wortmannin or the SB203580 for 30 min, followed by incubation with or without Fucoïdan for 1 h. Whole-cell lysates were analyzed by western blot using the appropriate antibodies. The specific protein bands were analyzed using the ChemiDoc™ Touch Imaging System (Bio-Rad, Hercules, CA)
